# Supplementary material for: Bacterial F-type ATP synthases follow a well-choreographed assembly pathway
Source: Nat Commun. 2022 Mar 8;13:1218. doi: 10.1038/s41467-022-28828-1 (PMC8904574; doi:10.1038/s41467-022-28828-1)
Supplement: Supplementary file 1 — Supplementary Information [file 41467_2022_28828_MOESM1_ESM.pdf]

## Supplementary Information

### Bacterial F-type ATP synthases follow a well-choreographed assembly pathway

Khanh Vu Huu<sup>1</sup>, Rene Zangl<sup>1</sup>, Jan Hoffmann<sup>1</sup>, Alicia Just<sup>1</sup> & Nina Morgner<sup>1</sup>

#### Author affiliations

<sup>1</sup>Institute of Physical and Theoretical Chemistry, Goethe University Frankfurt/Main, Max-von-Laue-Str. 9, 60438 Frankfurt/Main, Germany

#### Table of contents:

##### Supplementary Figures:

Supplementary Figure 1: Effects of ATP/Mg<sup>2+</sup> concentrations on MS-resolution and protein stability

Supplementary Figure 2: LILBID spectrum of *in cellula* produced  $\alpha\beta$  heterodimers in dependence of ATP/Mg<sup>2+</sup>

Supplementary Figure 3: Role of  $\alpha$  mutants on the assembly process

Supplementary Figure 4. Deconvoluted nESI-MS-spectra of ATP-binding of different  $\alpha$  mutants

Supplementary Figure 5: Mass spectrometric analysis with LILBID of *in vitro* assembly

Supplementary Figure 6: Dependence of  $\delta$ -subunit assembly to the  $\alpha_3\beta_3\gamma\epsilon$  pre-complex regarding to steric hindrance of affinity-tags and without nucleotide/Mg<sup>2+</sup> environment

Supplementary Figure 7: Purification and quality control of F<sub>1</sub> and F<sub>1</sub>-subcomplexes

Supplementary Figure 8: Expression of the subunits  $\gamma$ ,  $\epsilon$  and  $\gamma\epsilon$ -complex in *E. coli* BL21gold(DE3) cells

Supplementary Figure 9: Mass spectrometric analysis of next neighbor interactions by LILBID-MS in a nucleotide/Mg<sup>2+</sup> environment

Supplementary Figure 10. Ion mobility and mass spectrum of  $\alpha\beta$  heterodimer

## Supplementary Tables:

Supplementary Table 1: List of plasmids

Supplementary Table 2: List of primers

Supplementary Table 3: Calculated and experimental masses of F<sub>1</sub>-subunits, F<sub>1</sub> and F<sub>1</sub>-subcomplexes of *A. woodii*

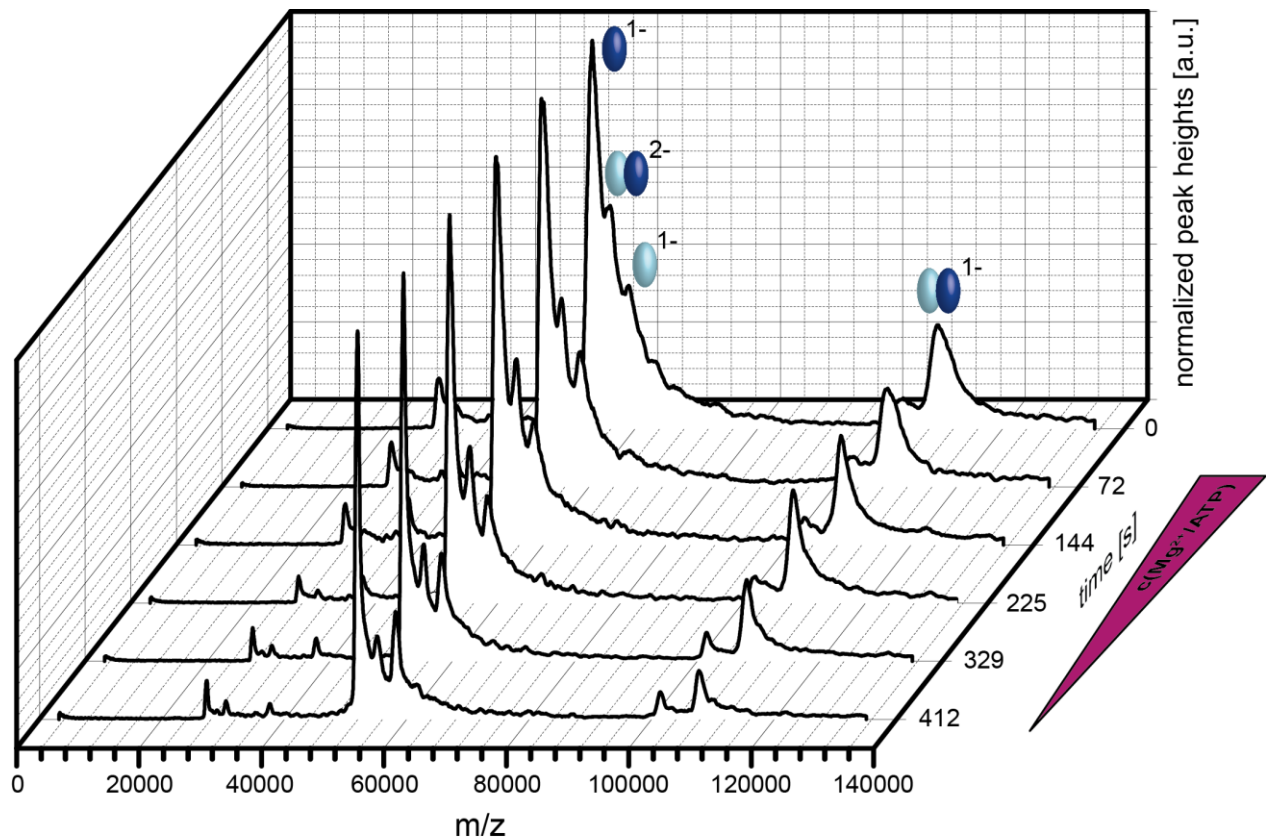

**Supplementary Figure 1. Effects of ATP/Mg<sup>2+</sup> concentrations on MS-resolution and protein complex stability.** LILBID-spectra of the *in vitro* assembled  $\alpha$ - (light blue) and  $\beta$ -subunit (dark blue) in 100 mM NH<sub>4</sub>OAc, 2 mM ATP, 2 mM MgCl<sub>2</sub>, pH 7.4. The LILBID droplet generator is filled with water before loading the sample of interest in front of the water. Over time the smaller molecules of the additives diffuse faster into the water than the proteins, leading to a dilution of the additives. Mass spectrometric measurements show the effects of this dilution, demonstrating that high ATP/Mg<sup>2+</sup> concentrations are stabilizing the  $\alpha\beta$  heterodimer complex but as well decrease the mass resolution. Source data are provided as a Source Data file.

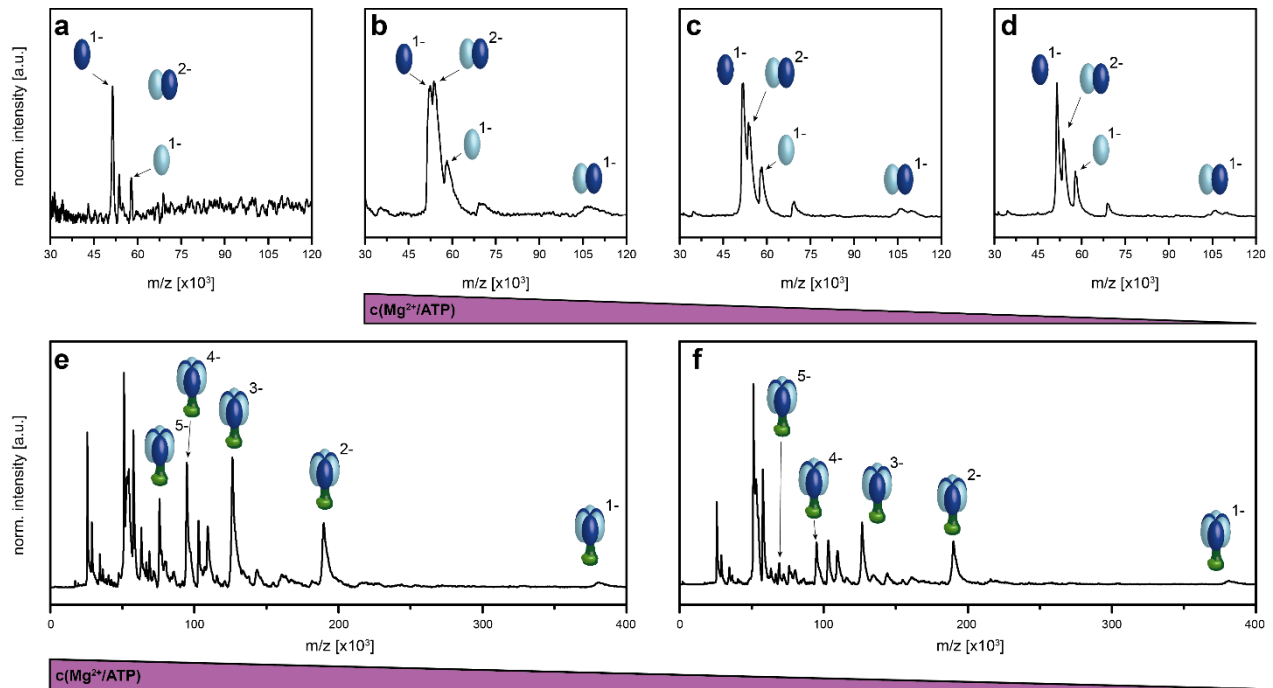

**Supplementary Figure 2. LILBID spectra of *in cellula* produced  $\alpha\beta$  heterodimers in dependence of ATP/Mg<sup>2+</sup>:** **a** *In cellula* purified  $\alpha\beta$  heterodimer (light and dark blue). Mass spectrometric analysis shows that without ATP/Mg<sup>2+</sup> the *in cellula* purified  $\alpha\beta$  heterodimer dissociates mostly into the subunits showing little stable complex. **b** *In cellula* purified  $\alpha\beta$  heterodimer (light and dark blue) in 2 mM ATP and 2 mM MgCl<sub>2</sub> shows a stabilization of the heterodimer accompanied by a decrease in signal resolution. **c** Buffer dilution leads to improved signal resolution. Comparison after 7 min (**d**) shows less dissociation of the dimer than the corresponding *in vitro* dimer (Supplementary Fig. 1) **e-f** *In vitro* assembled  $\alpha_3\beta_3\gamma_6$  complexes dissociate due to the dilution of the additives ATP/Mg<sup>2+</sup>. Source data are provided as a Source Data file.

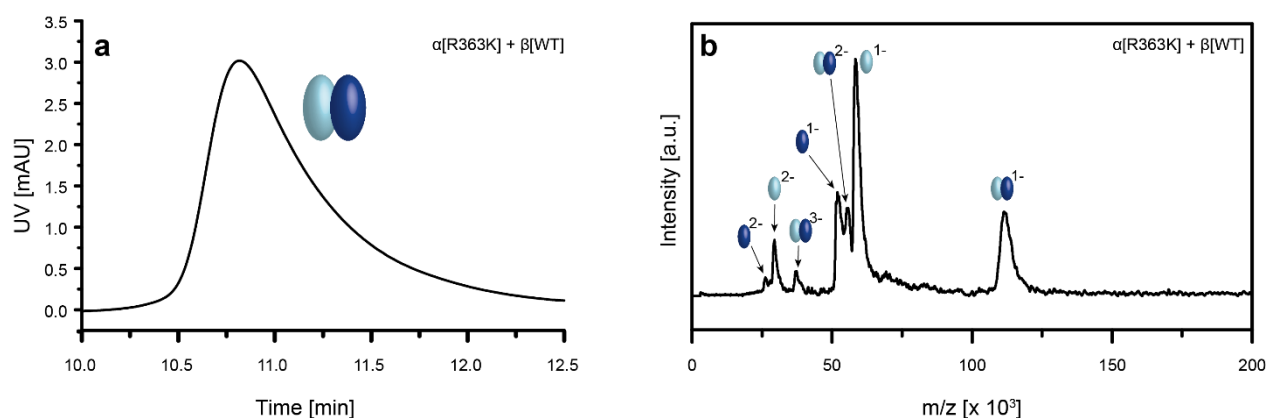

**Supplementary Figure 3. *In vitro* assembled  $\alpha[R363K]$  and  $\beta[WT]$ .** **a** HPLC shows  $\alpha\beta$  heterodimer assembly at an elution peak of 10.86 min. Running buffer: 50 mM KPi, 200 mM NaCl, 2 mM ATP, 2 mM  $MgCl_2$ , pH 7.4. **b** LILBID: The  $\alpha$ - (light blue),  $\beta$ -subunit (dark blue) were incubated at 4 °C for 1 hour. Mass spectrometric analysis revealed  $\alpha\beta$  heterodimer assembly with a charge state distribution (-1 to -3). Exchange of the positively charged arginine to an as well positive lysine does not hamper formation of the heterodimer. Source data are provided as a Source Data file.

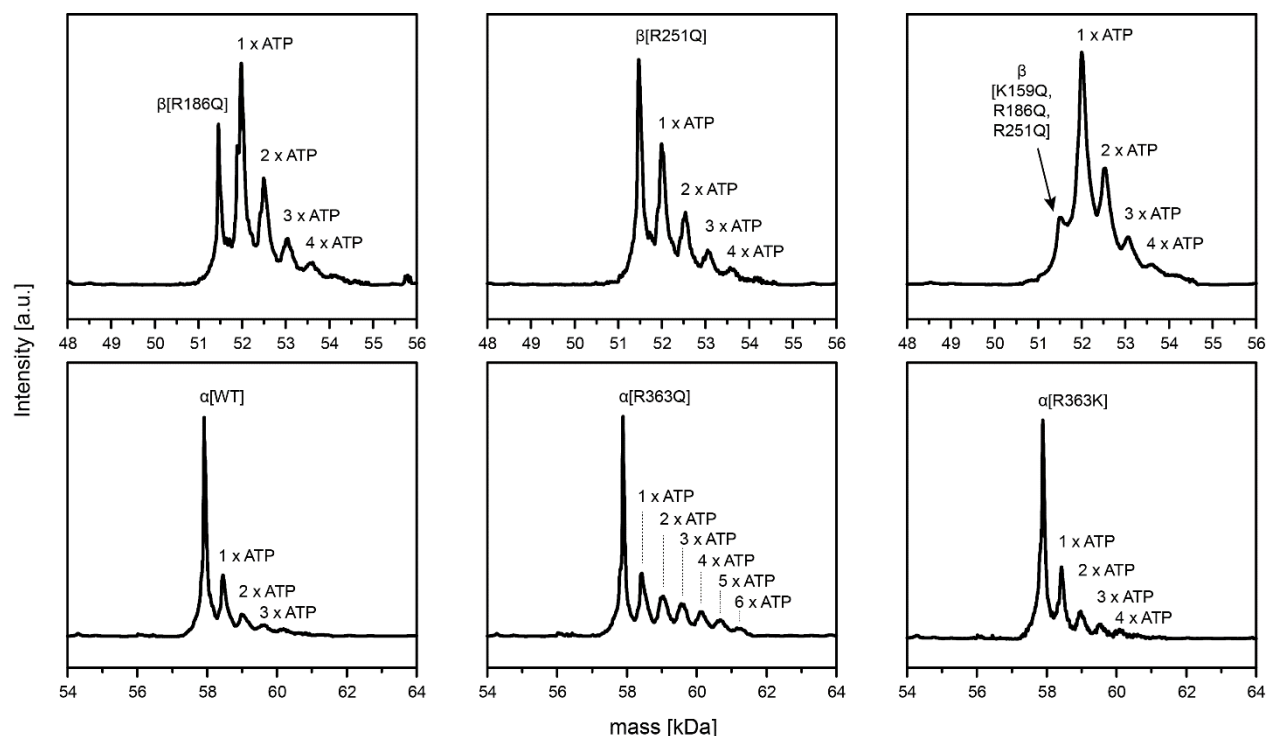

**Supplementary Figure 4. Deconvoluted nESI-MS-spectra of ATP-binding of different  $\beta$  mutants.** Source data are provided as a Source Data file.

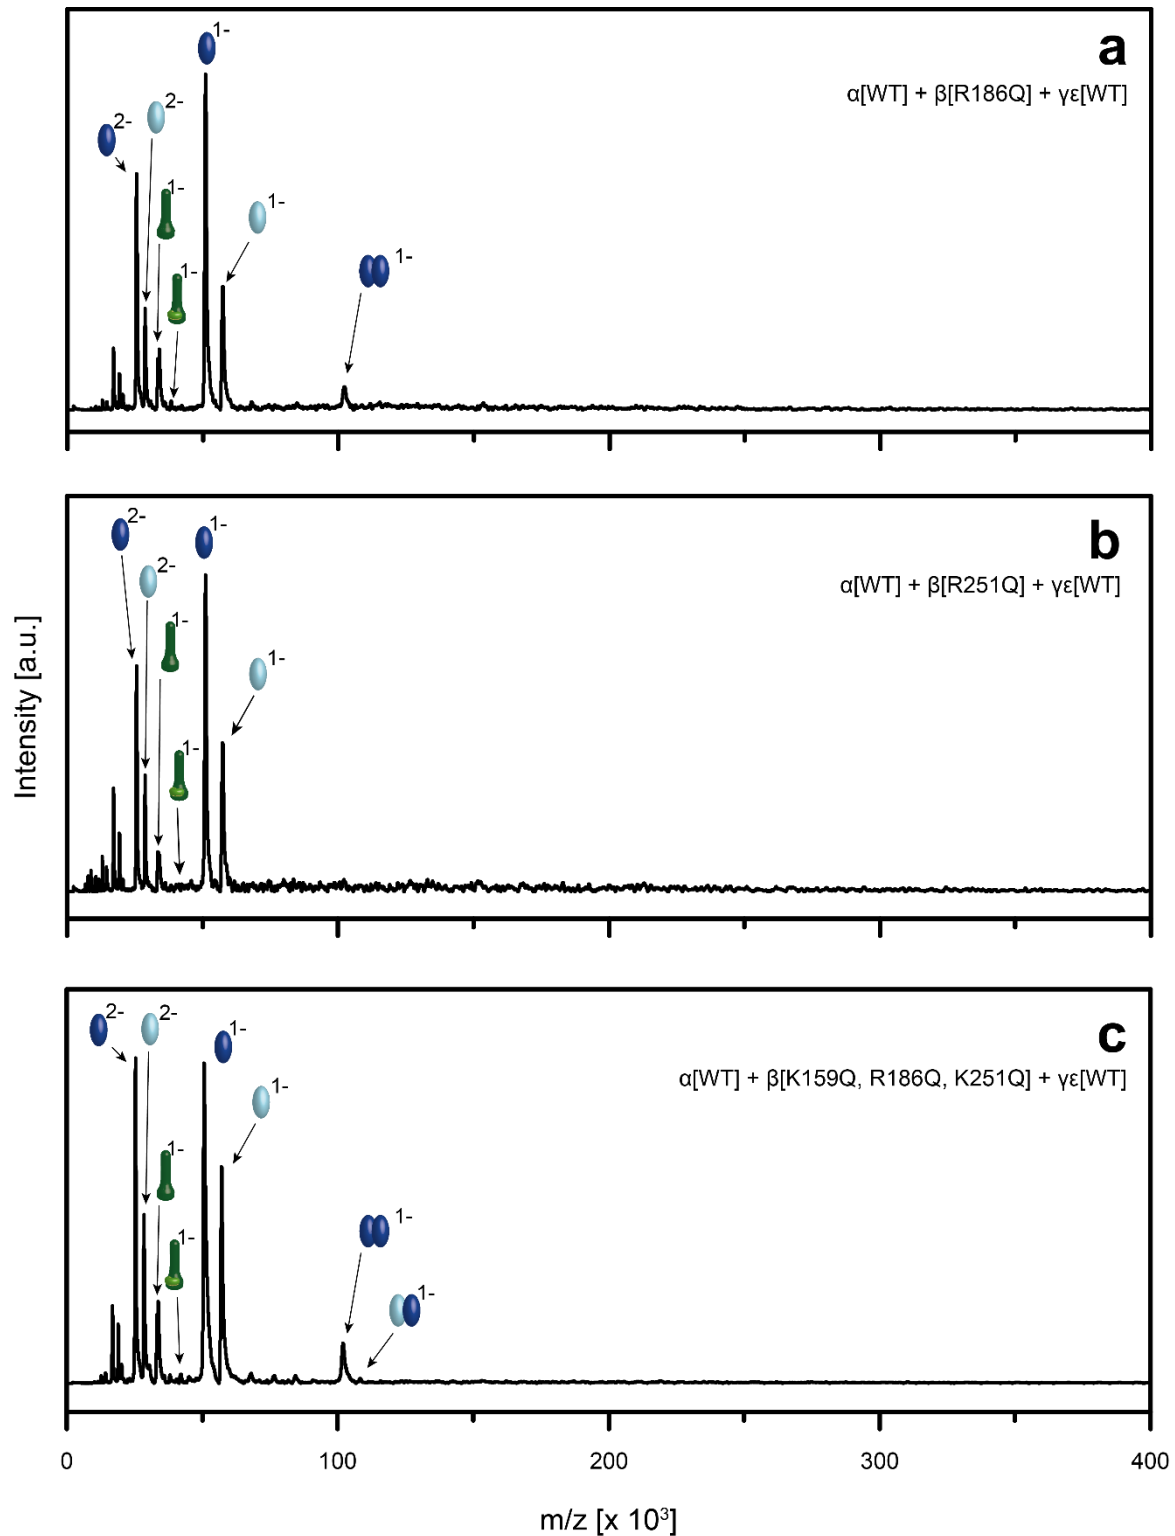

**Supplementary Figure 5. Mass spectrometric analysis with LILBID of *in vitro* assembly of  $\alpha[\text{WT}]$  and the central stalk  $\gamma\epsilon$  with  $\beta$  mutants.** *In vitro* assembly of  $\alpha[\text{WT}]$  (light blue) and  $\gamma\epsilon$  (dark and light green) with  $\beta[\text{R186Q}]$  (a) (dark blue),  $\beta[\text{R251Q}]$  (b) (dark blue) and  $\beta[\text{K159Q, R186Q, R251Q}]$  (c) (dark blue). Incubation in 50 mM KPi, 200 NaCl, 20 mM imidazole, 10% (v/v) glycerol, pH 7.4 at 4 °C for 1 hour and finally buffer exchanged in 100 mM  $\text{NH}_4\text{OAc}$ , 2 mM ATP, 2 mM  $\text{MgCl}_2$ , pH 7.4. Source data are provided as a Source Data file.

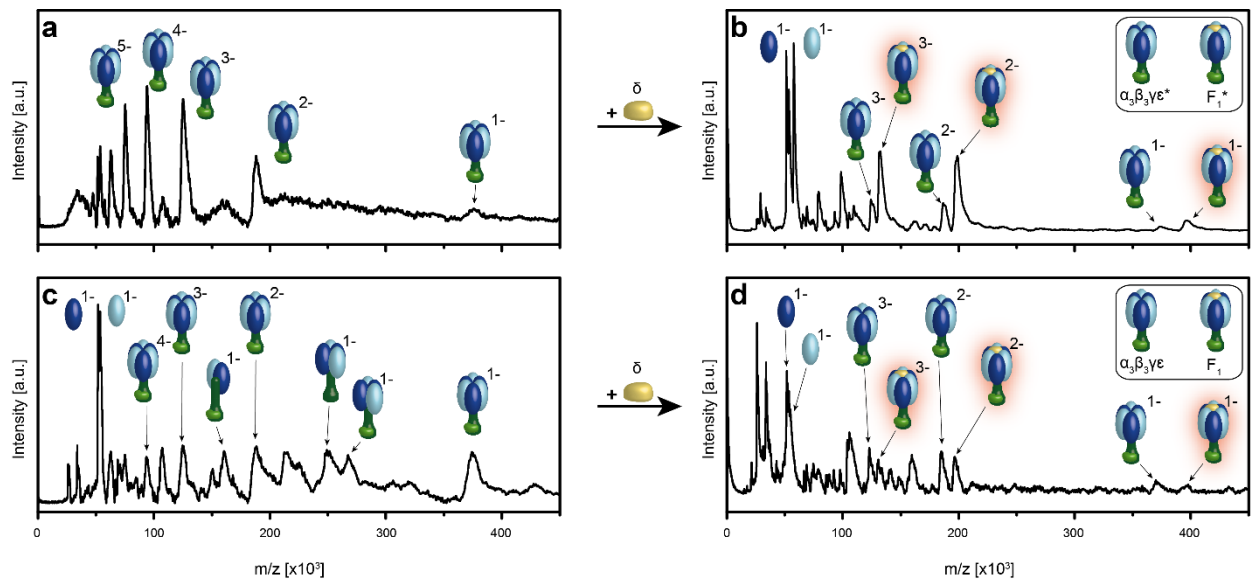

**Supplementary Figure 6.  $\delta$ -subunit binding to the *in cellula* purified  $\alpha_3\beta_3\gamma\epsilon$  pre-complexes as control for potential steric hindrance due to affinity-tags.** All measurements were performed without nucleotide/ $Mg^{2+}$  environment. **a-b** LILBID-MS: *In vitro* assembly of the  $\delta$ -subunit (yellow) with the  $\alpha_3\beta_3\gamma\epsilon^*$ -complex. The *in E. coli* heterologously purified  $\alpha_3\beta_3\gamma\epsilon^*$  corresponds to the subcomplex which can be *in vitro* assembled by single subunits  $\alpha$  (light blue),  $\beta$  (dark blue) and  $\gamma\epsilon$  (dark and light green). The  $\alpha$ - and  $\beta$ - subunits are N-terminally StreptI- and His<sub>6</sub>-tagged, respectively. The  $\epsilon$ -subunit is C-terminally His<sub>6</sub>-tagged. **c-d** *In vitro* assembly of the  $\delta$ -subunit (yellow) with the  $\alpha_3\beta_3\gamma\epsilon$  complex. This complex was only N-terminal His<sub>6</sub>-tagged in the  $\beta$ -subunit. Our data show that the complex  $\alpha_3\beta_3\gamma\epsilon^*$  can be produced *in cellula* and the N-terminal affinity-tags in all  $\alpha$  and  $\beta$  subunits in the  $\alpha_3\beta_3\gamma\epsilon^*$  complex have no steric effect that would hinder the assembly of the complex itself or the  $\delta$ -subunit to the hexameric head. The full reconstitution into  $F_1$  occurs here independently of nucleotides and  $Mg^{2+}$ . Interestingly, the subcomplexes  $\alpha_3\beta_3\gamma\epsilon^*$  and  $\alpha_3\beta_3\gamma\epsilon$  can be isolated and purified *in cellula* from *E. coli* and form stable complexes without the presence of ATP/ $Mg^{2+}$  as opposed to our *in vitro* complexes. Source data are provided as a Source Data file.

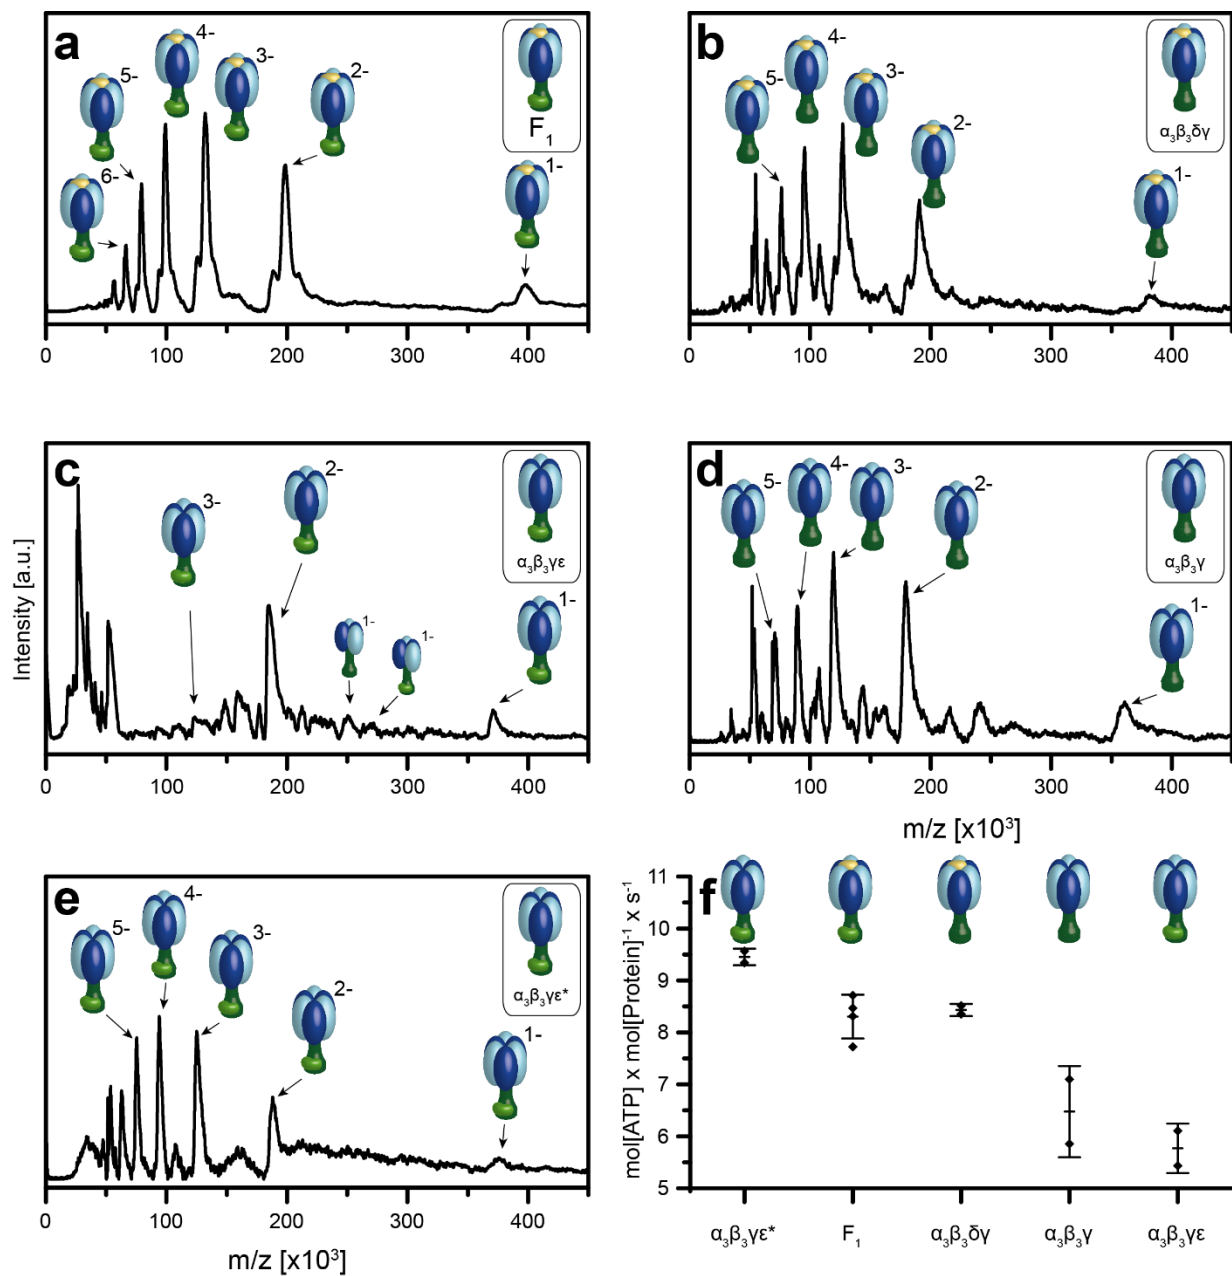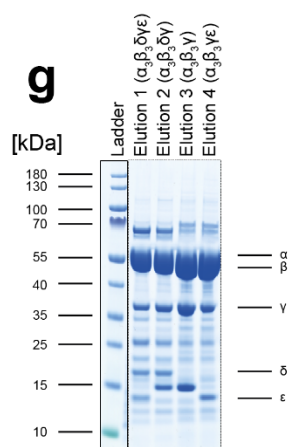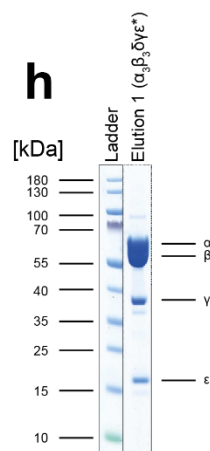

**Supplementary Figure 7. Purification and quality control of *in cellula* obtained F<sub>1</sub> and F<sub>1</sub>-subcomplexes.** LILBID-MS spectrum of F<sub>1</sub> (a),  $\alpha_3\beta_3\delta\gamma$  (b)  $\alpha_3\beta_3\gamma\epsilon$  (c)  $\alpha_3\beta_3\gamma$  (d) and  $\alpha_3\beta_3\gamma\epsilon^*$  (e). f ATP hydrolysis activity of each complex. Data are presented as mean values with error bars show the SD, with individual data superimposed. Data were collected in biological duplicates (n = 2) except F<sub>1</sub> with four biological replicates (n = 4). g SDS-PAGE (NuPAGE 4-12% Bis-Tris) of Ni-chelating affinity chromatography of purified F<sub>1</sub> and F<sub>1</sub>-subcomplexes. All constructs were N-terminal His<sub>6</sub>-tagged in the  $\beta$ -subunit. Isolation of purified F<sub>1</sub> ( $\alpha_3\beta_3\delta\gamma\epsilon$ ) complex (Elution 1),  $\alpha_3\beta_3\delta\gamma$  (Elution 2),  $\alpha_3\beta_3\gamma$  (Elution 3) and  $\alpha_3\beta_3\gamma\epsilon$  (Elution 4). N = 3 independent experiments. h SDS-PAGE (NuPAGE 4-12% Bis-Tris) of tandem affinity chromatography of purified F<sub>1</sub>-subcomplex ( $\alpha_3\beta_3\gamma\epsilon^*$ ), using Ni-chelating followed by Strep-Tactin chromatography. This in *E. coli* heterologous purified  $\alpha_3\beta_3\gamma\epsilon^*$  complex is N-terminal StrepI- and His<sub>6</sub>-tagged in  $\alpha$  and  $\beta$ , respectively, where the  $\epsilon$ -subunit is C-terminal His<sub>6</sub>-tagged. N = 3 independent experiments. Source data are provided as a Source Data file.

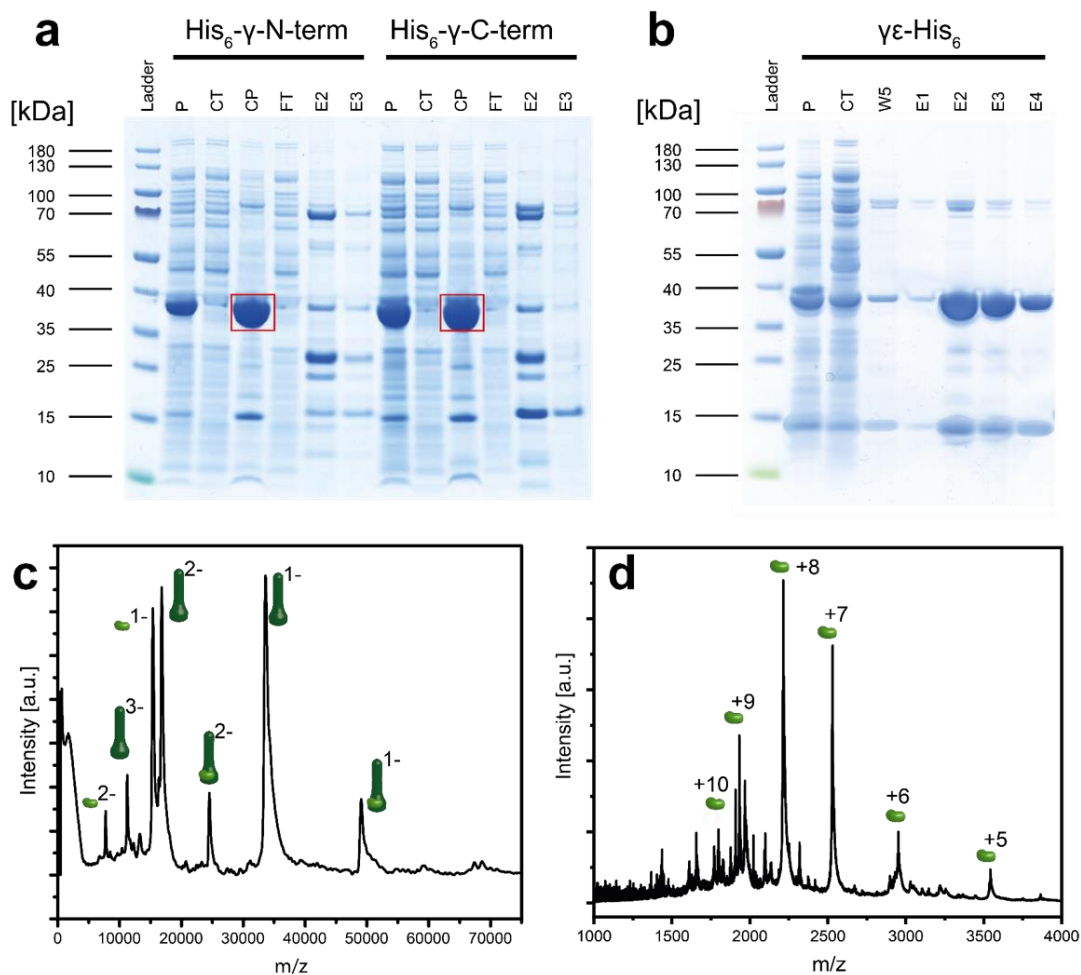

**Supplementary Figure 8. Expression of the subunits  $\gamma$ ,  $\epsilon$  and  $\gamma\epsilon$ -complex in *E. coli* BL21gold(DE3) cells.** a Dependence of the affinity tag (His<sub>6</sub>-tag) at the N- or C-terminus. In both cases the  $\gamma$ -subunit forms inclusion bodies in the cell pellet (CP) (indicated in red boxes). Abbreviations: pellet (P), cytoplasm (CT), flow through (FT), elution fraction 2 (E2) and elution fraction 3 (E3). N = 3 independent experiments. b Coomassie-stained SDS-PAGE shows successful purification of the  $\gamma\epsilon$  complex (harboring a C-terminal His<sub>6</sub>- or StrepI-tag) indicated in elution fractions 1-4 (E1-4). c Quality control via LILBID-MS shows the  $\gamma\epsilon$  complex with a charge state distribution (marked with -1 and -2). Due to

high laser energy the complex dissociated partially into  $\gamma$  (dark green) and  $\epsilon$  (light green). **d** nESI spectrum of the  $\epsilon$ -subunit (containing a C-terminal StrepI-tag) with a charge state distribution (+5 to +10) could verify successful purification. N = 3 independent experiments. Source data are provided as a Source Data file.

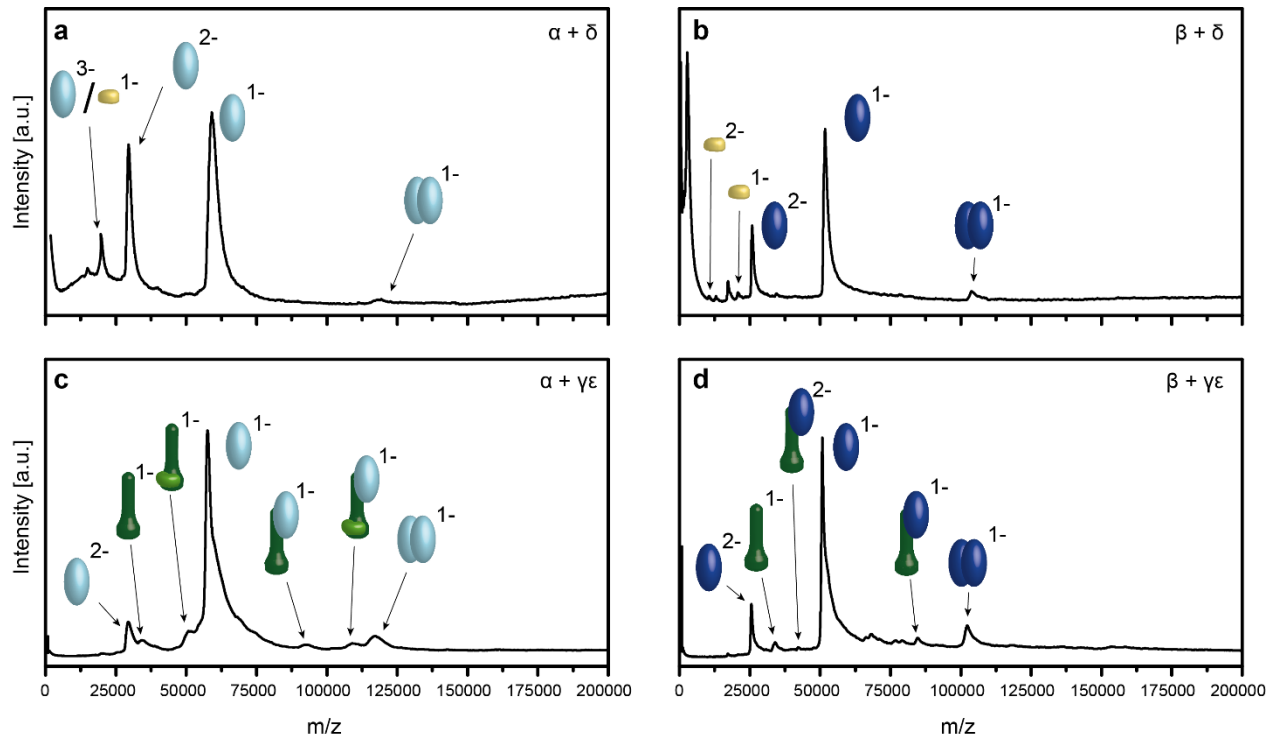

**Supplementary Figure 9. Mass spectrometric analysis of next neighbor interactions by LILBID-MS in a nucleotide/ $\text{Mg}^{2+}$  environment.** All incubation experiments were done at protein ratios as expected from the complexes ( $\alpha:\delta$  in a ratio 3:1) **a-b** Assembly studies of subunit  $\alpha$  (light blue) or  $\beta$  (dark blue) with  $\delta$  demonstrate no specific interactions into higher complexes. **c-d** Assembly studies of subunit  $\alpha$  (light blue) or  $\beta$  (dark blue) with the central stalk  $\gamma\epsilon$  show a binding ratio of 1:1. Due to high laser energy the complexes dissociated partially into  $\alpha\gamma$  or  $\beta\gamma$  and dissociated subunit  $\epsilon$ . Source data are provided as a Source Data file.

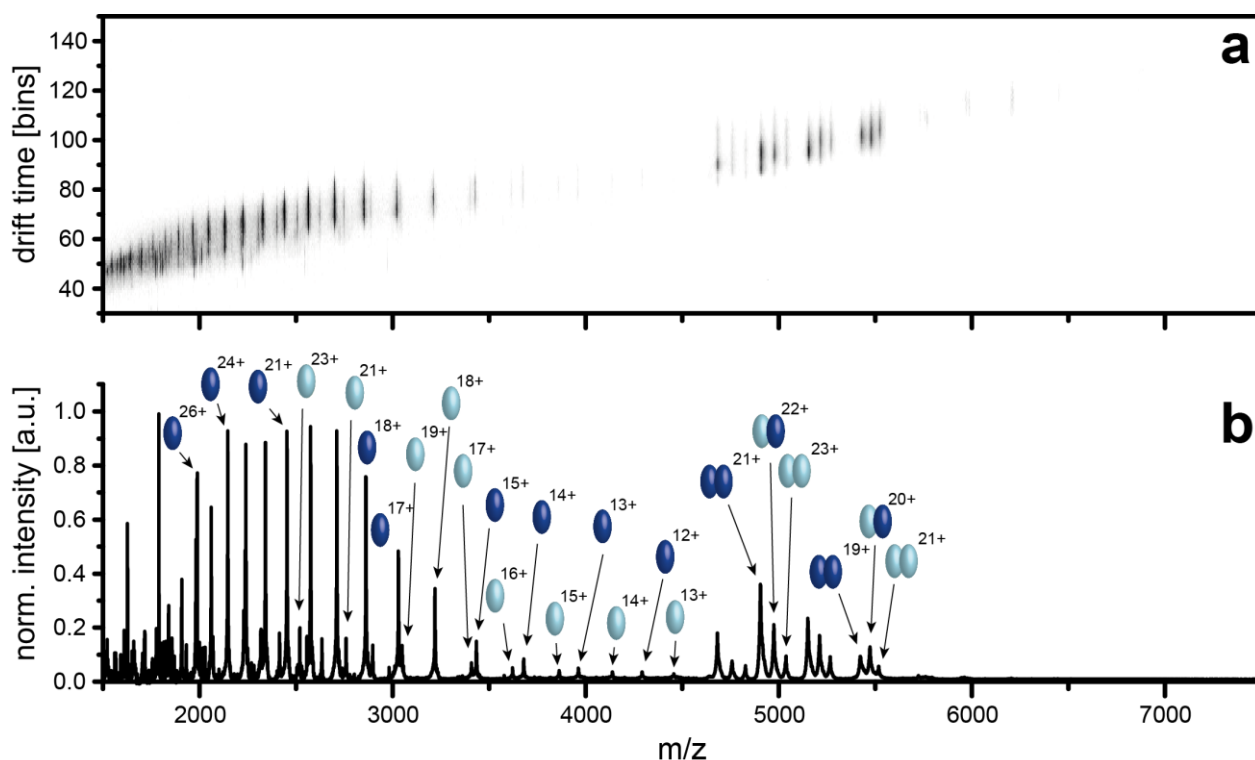

**Supplementary Figure 10. Ion mobility and mass spectrum of  $\alpha\beta$  heterodimer. a** ion mobility. **b** mass spectrum. Source data underlying Supplementary Fig. 10b are provided as a Source Data file.

**Supplementary Table 1. List of plasmids.**

|     | Plasmid-Nr. | Construct                             | Name                                                                              |
|-----|-------------|---------------------------------------|-----------------------------------------------------------------------------------|
| 1.  | pKV006      | $\beta$                               | pKV006_pET21a_His6-atpD_N-term                                                    |
| 2.  | pKV007      | $\alpha$                              | pKV007_pET21a_Strepl-atpA_N-term                                                  |
| 3.  | pKV025      | $\epsilon$                            | KV025_pET21a_atpC-Strepl-C-term                                                   |
| 4.  | pKV026      | $\epsilon$                            | KV026_pET21a_atpC-His6-C-term                                                     |
| 5.  | pKV027      | $\gamma\epsilon$                      | pKV027_pET21a_atpG-atpC-His6-C-term                                               |
| 6.  | pKV030      | $\alpha_3\beta_3\gamma\epsilon^*$     | pKV030_pET21a_tetracis(Strepl-atpA-N-term_His6-atpD-N-term_atpG_atpC-His6-C-term) |
| 7.  | pKV032      | $\delta$                              | pKV032_pET21a_atpH-His6-C-term                                                    |
| 8.  | pKV035      | $\beta$ [K159Q]                       | pKV035_pET21a_His6-atpD_[K159Q]                                                   |
| 9.  | pKV036      | $\beta$ [R186Q]                       | pKV036_pET21a_His6-atpD_[R186Q]                                                   |
| 10. | pKV037      | $\beta$ [R251Q]                       | pKV037_pET21a_His6-atpD_[R251Q]                                                   |
| 11. | pKV038      | $\beta$ [K159Q_R186Q_R251Q]           | pKV038_pET21a_His6-atpD_[K159Q_R186Q_R251Q]                                       |
| 12. | pKV043      | $\alpha\beta$                         | KV043_pET21a_bicis(Strepl-atpA_His6-atpD-N-term)                                  |
| 13. | pKV044      | $\alpha_3\beta_3\delta\gamma\epsilon$ | pKV044_pET21a-atpH-atpA-atpG_His6-N-term_atpD_atpC                                |
| 14. | pKV045      | $\alpha_3\beta_3\delta\gamma$         | pKV045_pET21a_tetracis(atpH_atpA_His6-atpD-N-term_atpG)                           |
| 15. | pKV046      | $\alpha_3\beta_3\gamma$               | pKV046_pET21a_tricis(atpA_His6-atpD-N-term_atpG)                                  |
| 16. | pKV047      | $\alpha_3\beta_3\gamma\epsilon$       | pKV047_pET21a_tetracis(atpA_His6-atpD-N-term_atpG_atpC)                           |
| 17. | pKV050      | $\Delta\alpha$ [R363Q]                | pKV050_pET21a_Strepl-atpA_[R363Q]                                                 |
| 18. | pKV051      | $\Delta\alpha$ [R363K]                | pKV051_pET21a_Strepl-atpA_[R363K]                                                 |

**Supplementary Table 2. List of primer.**

| Number | Name                         | Length | Orientation | T <sub>m</sub><br>[°C] | Sequence [5'3']                                                                         | Construct<br>Template |
|--------|------------------------------|--------|-------------|------------------------|-----------------------------------------------------------------------------------------|-----------------------|
| KV001  | His6-atpD_N-term_for         | 38     | forward     | 53.5                   | CACCATCACCATCACGCCAAAAATATAGGGAAG<br>GTTGT                                              | pKV006                |
| KV054  | His6-atpD-N-term_rev         | 44     | reverse     | 53                     | GAATTCGGATCCCTAACCTTTGATTTTTTTTGCTT<br>TTACTACAG                                        | pKV006                |
| KV011  | Strepl-atpA-N-term           | 78     | forward     | 54                     | GGTTCTGGCGGTGGATCGGGAGGTTTCAGCGTGG<br>AGCCACCCGCAGTTCGAAAAAAATCTCCGACCAG<br>AGGAAATAAGT | pKV007                |
| KV052  | Strepl-atpA-N-term_rev       | 48     | reverse     | 55.7                   | GAATTCGGATCCCTATACAGATTTACTGAAAAC<br>TTTTTATAAGCCTC                                     | pKV007                |
| KV058  | atpG-atpC_for                | 24     | forward     | 54                     | GAAGGAGATATACATATGGCAGAG                                                                | pKV027                |
| KV047  | atpG-atpC-His6-C-term_rev    | 41     | reverse     | 53.2                   | ATGGTGATGGTGATGTACATTTTCTTTTGAGTTG<br>ATCCGAG                                           | pKV027                |
| KV011  | Strepl-atpA-N-term           | 78     | forward     | 54                     | GGTTCTGGCGGTGGATCGGGAGGTTTCAGCGTGG<br>AGCCACCCGCAGTTCGAAAAAAATCTCCGACCAG<br>AGGAAATAAGT | pKV030                |
| KV097  | atpG-atpC-His6_rev           | 39     | reverse     | 55.7                   | GCAAGCTTGTGCGACGCTAGTGATGGTGATGGTG<br>ATGTAC                                            | pKV030                |
| KV075  | atpH-His6_for                | 42     | forward     | 55.2                   | GAAGGAGATATACATATGAGTTTAGTTGCAAGT<br>AAATACGCC                                          | pKV032                |
| KV076  | atpH-His6_rev                | 46     | reverse     | 53.8                   | ATGGTGATGGTGATGTAGTCTTAAATTGTTT<br>ACTTGTTTTTC                                          | pKV032                |
| KV079  | atpD_[K159Q]_for             | 37     | forward     | 54.8                   | CAGACCGTATTGATTAGGAAATTAATTAATAATA<br>TTG                                               | pKV035                |
| KV080  | atpD_[K159Q]_rev             | 25     |             | 53.5                   | AATCAATACGGTCTGACCAACTCCG                                                               | pKV035                |
| KV081  | atpD_[R186Q]_for             | 21     | forward     | 55.9                   | CAGACCCGTGAAGGGAATGAC                                                                   | pKV036                |
| KV082  | atpD_[K186Q]_rev             | 20     | reverse     | 55.4                   | CCCTTCACGGGTCTGTTCTC                                                                    | pKV036                |
| KV083  | atpD_[R251Q]_for             | 29     | forward     | 54.8                   | CAGTTTACTCAAGCTGGTTCAGAAGTTTC                                                           | pKV037                |
| KV084  | atpD_[R251Q]_rev             | 31     | reverse     | 54.4                   | AGCTTGAGTAACTGGAAAATGTTATCAATG                                                          | pKV037                |
| KV083  | atpD_[R251Q]_for             | 29     | forward     | 54.8                   | CAGTTTACTCAAGCTGGTTCAGAAGTTTC                                                           | pKV038                |
| KV084  | atpD_[K251Q]_rev             | 31     | reverse     | 54.4                   | AGCTTGAGTAACTGGAAAATGTTATCAATG                                                          | pKV038                |
| KV011  | Strepl-atpA-N-term           | 78     | forward     | 54                     | GGTTCTGGCGGTGGATCGGGAGGTTTCAGCGTGG<br>AGCCACCCGCAGTTCGAAAAAAATCTCCGACCAG<br>AGGAAATAAGT | pKV043                |
| KV090  | Strepl-atpA_His6-atpD_rev    | 47     | reverse     | 55.4                   | GCAAGCTTGTGCGACGCTAACCTTTGATTTTTTTG<br>CTTTTACTACAG                                     | pKV043                |
| KV075  | atpH-His6_for                | 42     | forward     | 55.2                   | GAAGGAGATATACATATGAGTTTAGTTGCAAGT<br>AAATACGCC                                          | pKV044                |
| KV099  | atpH_atpA_atpG_atpD_atpC_rev | 26     | reverse     | 53.2                   | TACATTTTCTTTGAGTTGATCCGAG                                                               | pKV044                |
| KV075  | atpH-His6_for                | 42     | forward     | 55.2                   | GAAGGAGATATACATATGAGTTTAGTTGCAAGT<br>AAATACGCC                                          | pKV045                |
| KV101  | atpH_atpA_atpG_His6-atpD_rev | 45     | reverse     | 53.4                   | TGCGGCCGCAAGCTTCTAACCTTTGATTTTTTTG<br>CTTTTACTAC                                        | pKV045                |
| KV102  | atpA_atpG_His6-atpD_rev      | 41     | forward     | 56                     | GAAGGAGATATACATATGAATCTCCGACCAGAG<br>GAAATAAG                                           | pKV046                |
| KV101  | atpH_atpA_atpG_His6-atpD_rev | 45     | reverse     | 53.4                   | TGCGGCCGCAAGCTTCTAACCTTTGATTTTTTTG<br>CTTTTACTAC                                        | pKV046                |
| KV102  | atpA_atpG_His6-atpD_rev      | 41     | forward     | 56                     | GAAGGAGATATACATATGAATCTCCGACCAGAG<br>GAAATAAG                                           | pKV047                |
| KV099  | atpH_atpA_atpG_atpD_atpC_rev | 26     | reverse     | 53.2                   | TACATTTTCTTTGAGTTGATCCGAG                                                               | pKV047                |
| KV110  | atpA_[R363Q]_for             | 23     | forward     | 53                     | GGGATTTCAAGTATCTCAAGTTGG                                                                | pKV050                |
| KV111  | atpA_[R363Q]_rev             | 24     | reverse     | 55.7                   | AGATACTGAAATCCCGGGTTAAC                                                                 | pKV050                |
| KV112  | atpA_[R363K]_for             | 25     | forward     | 53                     | GGGATTTCAAGTATCTAAGTTGGTG                                                               | pKV051                |
| KV111  | atpA_[R363Q]_rev             | 24     | reverse     | 55.7                   | AGATACTGAAATCCCGGGTTAAC                                                                 | pKV051                |

**Supplementary Table 3. Calculated and experimental masses of F<sub>1</sub>-subunits, F<sub>1</sub> and F<sub>1</sub>-subcomplexes of *A. woodii*.** The purified constructs bearing a N-terminal His<sub>6</sub>- (0.978 kDa) or Strepl-tag (3.176 kDa) or a C-terminal His<sub>6</sub>- or Strepl-tag. Errors shown are FWHM. (†) Affinity-tag is located at the C-terminus. (††) Affinity-tag is located at the N-terminus.

| Construct                                                                                                            | Molecular weight [kDa] |            |                       |            |
|----------------------------------------------------------------------------------------------------------------------|------------------------|------------|-----------------------|------------|
|                                                                                                                      | Calculated mass        |            | Experimental mass     |            |
|                                                                                                                      | His <sub>6</sub> -tag  | Strepl-tag | His <sub>6</sub> -tag | Strepl-tag |
| $\alpha^{\dagger\dagger}$                                                                                            | -                      | 58.046     | -                     | 58 ± 2     |
| $\beta^{\dagger\dagger}$                                                                                             | 51.486                 | -          | 51.4 ± 1.7            | -          |
| $\epsilon^{\dagger}$                                                                                                 | 15.660                 | 17.864     | 15.4 ± 0.4            | 17.7 ± 0.2 |
| $\delta^{\dagger}$                                                                                                   | 21.537                 | -          | 21.5 ± 0.5            | -          |
| $\gamma\epsilon^{\dagger}$                                                                                           | 49.676                 | -          | 49.1 ± 0.6            | -          |
| $\alpha_3\beta_3^{\dagger\dagger}\delta\gamma\epsilon$ (F <sub>1</sub> )                                             | 390.461                | -          | 391 ± 15              | -          |
| $\alpha_3\beta_3^{\dagger\dagger}\delta\gamma$                                                                       | 375.624                | -          | 375 ± 19              | -          |
| $\alpha_3\beta_3^{\dagger\dagger}\gamma\epsilon$                                                                     | 369.801                | -          | 370 ± 16              | -          |
| $\alpha_3\beta_3^{\dagger\dagger}\gamma$                                                                             | 358.910                | -          | 359 ± 15              | -          |
| $\alpha_3^{\dagger\dagger}\beta_3^{\dagger\dagger}\gamma\epsilon^{\dagger}$<br>( $\alpha_3\beta_3\gamma\epsilon^*$ ) | 378.272                |            | 378 ± 16              |            |
