# Supplementary material for: Bacterial F-type ATP synthases follow a well-choreographed assembly pathway
Source: Nat Commun. 2022 Mar 8;13:1218. doi: 10.1038/s41467-022-28828-1 (PMC8904574; doi:10.1038/s41467-022-28828-1)
Supplement: Supplementary file 3 — Source data [file 41467_2022_28828_MOESM3_ESM.xlsx]

## Sheet: 1a
Fig. 1a
			molecular weight [kDa]
		Construct	calculated mass	experimental mass	error (FWHM)
		α	58.046	58	2
		β	51.486	51	1.1
		αα	116.092	115	2
		ββ	102.972	102	3
		αβ	109.532	109	3

## Sheet: 1b
Fig. 1b
			molecular weight [kDa]
		Construct	calculated mass	experimental mass	error (FWHM)
		α	58.046	58	3
		β	51.486	52	3
		ββ	102.972	103	3
		αβ	109.532	110	5

## Sheet: 1c
Fig. 1c

## Sheet: 2b
Fig. 2b

## Sheet: 3a
Fig. 3a
			molecular weight [kDa]
		Construct	calculated mass	experimental mass	error (FWHM)
		α	58.046	58	2
		β	51.486	51.3	1.6
		ββ	102.972	103	3
		αβ	109.532	109	10
		γ	34.016	34.4	1.5

## Sheet: 3b
Fig. 3b
			molecular weight [kDa]
		Construct	calculated mass	experimental mass	error (FWHM)
		α	58.046	58.5	0.8
		β	51.486	52	0.7
		ββ	102.972	102.9	1.3
		γ	34.016	34.8	1.4
		δ	21.537	21.2	0.4

## Sheet: 3c
Fig. 3c
			molecular weight [kDa]
		Construct	calculated mass	experimental mass	error (FWHM)
		α	58.046	58	1.6
		β	51.486	51.2	1.2
		αβ	109.532	110	3
		αβγ	143.548	143	3
		αβγε	159.208	159	4
		α3β3γε	378.272	378	13

## Sheet: 3d
Fig. 3d
			molecular weight [kDa]
		Construct	calculated mass	experimental mass	error (FWHM)
		α	58.046	58	2
		β	51.486	51.7	1.5
		αβγε	159.208	159	4
		α3β3γεδ	399.809	399	8

## Sheet: 4a
Fig. 4a
			molecular weight [kDa]
		Construct	calculated mass	experimental mass	error (FWHM)
		ββ	102.972	102.9	1.8
		αβ	109.532	110	3
		αβγ	143.548	143	3
		αβγε	159.208	159	4
		α3β3γε	378.272	379	12

## Sheet: 4b
Fig. 4b
			molecular weight [kDa]
		Construct	calculated mass	experimental mass	error (FWHM)
		ββ	102.972	103	2
		αβ	109.532	110	3
		α3β3γε	378.272	378	14

[truncated: 51 more sheets: 4c, 4d, 6a, 6b, 6c, 6d, 6e, 6f, 6g, 6h, 6i, 7a, 7b, 7c, 7d, 9a, 9b, S1, S2a, S2b …]
